# Supplementary material for: Comparative Effectiveness of Antidiabetic Drugs as an Additional Therapy to Metformin in Women with Polycystic Ovary Syndrome: A Systematic Review of Metabolic Approaches
Source: Hindawi journal article supplement (doi:10.1155/2024/9900213), 2024-03-11
Supplement: f1 [file 9900213.f1.zip]

## Supplementary file 2: Details of quality assessment process

| Study                      | Questions of NIH quality assessment tool for controlled intervention studies <sup>1</sup> |     |     |     |     |     |     |     |     |     |     |     |     |     | Summary quality <sup>2</sup> |
|----------------------------|-------------------------------------------------------------------------------------------|-----|-----|-----|-----|-----|-----|-----|-----|-----|-----|-----|-----|-----|------------------------------|
|                            | 1                                                                                         | 2   | 3   | 4   | 5   | 6   | 7   | 8   | 9   | 10  | 11  | 12  | 13  | 14  |                              |
| Ali et al 2019             | Yes                                                                                       | Yes | No  | No  | No  | Yes | Good                         |
| Baillargeon et al 2004     | Yes                                                                                       | Yes | Yes | Yes | No  | No  | Yes | Yes | Yes | Yes | Yes | Yes | NR  | Yes | Good                         |
| Daneshjou et al 2022       | Yes                                                                                       | Yes | Yes | Yes | No  | Yes | No  | Yes | Good                         |
| Elkind-Hirsch et al 2008   | Yes                                                                                       | Yes | No  | No  | No  | Yes | No  | Yes | Good                         |
| Elkind-Hirsch et al 2017   | Yes                                                                                       | Yes | No  | No  | Yes | NR  | Yes | Good                         |
| Ferjan et al 2017          | Yes                                                                                       | No  | No  | No  | No  | Yes | Yes | Yes | Yes | Yes | Yes | NR  | Yes | Yes | Fair                         |
| Jensterle Sever et al 2014 | Yes                                                                                       | Yes | No  | No  | No  | Yes | Yes | Yes | Yes | Yes | Yes | NR  | Yes | Yes | Good                         |
| Li et al 2020              | Yes                                                                                       | Yes | No  | No  | No  | Yes | Good                         |
| Liao et al 2011            | Yes                                                                                       | No  | No  | No  | No  | NR  | Yes | Yes | Yes | Yes | Yes | Yes | NR  | Yes | Fair                         |
| Ma et al 2021              | Yes                                                                                       | Yes | No  | No  | No  | Yes | No  | Yes | Good                         |
| Sohrevardi et al 2016      | Yes                                                                                       | Yes | No  | No  | No  | NR  | No  | Yes | Yes | Yes | Yes | NR  | Yes | Yes | Fair                         |
| Tao et al 2018             | Yes                                                                                       | No  | No  | No  | No  | Yes | Good                         |
| Tao et al 2021             | Yes                                                                                       | Yes | No  | No  | No  | Yes | NR  | Yes | Good                         |
| Wen et al 2023             | Yes                                                                                       | Yes | No  | No  | No  | Yes | Good                         |
| Xing et al 2022            | Yes                                                                                       | Yes | No  | No  | No  | Yes | No  | Yes | Good                         |
| Zhang et al 2022           | Yes                                                                                       | Yes | No  | No  | No  | Yes | No  | Yes | Yes | Yes | Yes | No  | Yes | Yes | Fair                         |

1: Available online at: <https://www.nhlbi.nih.gov/health-topics/studyquality-assessment-tools>  
2: For each paper, a total score of 0-4 out of 14 was rated as poor quality, 5-9 out of 14 as fair quality, and 10-14 out of 14 as good quality
